# Supplementary material for: Investigating the influence of oriented external electric fields on modulating spin-transition temperatures in Fe(ii) SCO complexes: a theoretical perspective
Source: Royal Society of Chemistry journal article supplement (doi:10.1039/d4dt00808a), 2024-01-01
Supplement: d4dt00808a1.pdf [file d4dt00808a1.pdf]

## Investigating the Influence of Oriented External Electric Fields on Modulating Spin-Transition Temperatures in Fe(II) SCO Complexes: A Theoretical Perspective

Rupesh Kumar Tiwari, Rajdeep Paul and Gopalan Rajaraman\*

Department of Chemistry, Indian Institute of Technology, Powai, Mumbai, India.

E-mail: [rajaraman@chem.iitb.ac.in](mailto:rajaraman@chem.iitb.ac.in)

**Table S1:** DFT optimised geometrical parameters of **1** in the presence of an Oriented External Electric Fields

| High spin                      |       |       |       |       |       |       |              |                     |
|--------------------------------|-------|-------|-------|-------|-------|-------|--------------|---------------------|
| $F_z$ (V/Å)                    | Fe-N1 | Fe-N2 | Fe-N3 | Fe-N4 | Fe-N5 | Fe-N6 | Average Fe-N | $\angle$ SCN-Fe-NCS |
| <b>1</b> <sub>xray</sub>       | 2.060 | 2.059 | 2.269 | 2.269 | 2.198 | 2.197 | 2.175        | 98.114              |
| <b>1</b> <sub>opt</sub>        | 2.064 | 2.064 | 2.261 | 2.261 | 2.199 | 2.199 | 2.175        | 97.353              |
| 0.1285 <b>1</b> <sub>opt</sub> | 2.096 | 2.096 | 2.255 | 2.255 | 2.193 | 2.192 | 2.181        | 90.379              |
| 0.2570 <b>1</b> <sub>opt</sub> | 2.134 | 2.134 | 2.249 | 2.249 | 2.196 | 2.196 | 2.193        | 86.145              |
| 0.3855 <b>1</b> <sub>opt</sub> | 2.186 | 2.186 | 2.239 | 2.239 | 2.197 | 2.197 | 2.207        | 81.872              |
| 0.5140 <b>1</b> <sub>opt</sub> | 2.264 | 2.266 | 2.225 | 2.225 | 2.194 | 2.193 | 2.228        | 77.767              |
| 0.6425 <b>1</b> <sub>opt</sub> | 2.429 | 2.470 | 2.206 | 2.207 | 2.163 | 2.162 | 2.272        | 71.636              |

**Note:** Here, <sup>N</sup>**M**<sub>opt</sub> denoted the optimised geometry at N V/Å applied OEEF of molecule **M**.

**Table S2:** Geometrical parameters of **1** in the presence of an Oriented External Electric Field

| Low spin                       |       |       |       |       |       |       |              |                     |
|--------------------------------|-------|-------|-------|-------|-------|-------|--------------|---------------------|
| $F_z$ (V/Å)                    | Fe-N1 | Fe-N2 | Fe-N3 | Fe-N4 | Fe-N5 | Fe-N6 | Average Fe-N | $\angle$ SCN-Fe-NCS |
| <b>1</b> <sub>xray</sub>       | 1.93  | 1.93  | 1.979 | 1.979 | 1.976 | 1.976 | 1.962        | 90.734              |
| <b>1</b> <sub>opt</sub>        | 1.93  | 1.93  | 1.98  | 1.98  | 1.976 | 1.976 | 1.962        | 90.833              |
| 0.1285 <b>1</b> <sub>opt</sub> | 1.937 | 1.937 | 1.988 | 1.988 | 1.977 | 1.977 | 1.967        | 88.668              |
| 0.2570 <b>1</b> <sub>opt</sub> | 1.945 | 1.945 | 1.995 | 1.995 | 1.980 | 1.980 | 1.973        | 86.542              |
| 0.3855 <b>1</b> <sub>opt</sub> | 1.955 | 1.955 | 2.003 | 2.003 | 1.985 | 1.985 | 1.981        | 84.851              |
| 0.5140 <b>1</b> <sub>opt</sub> | 1.966 | 1.966 | 2.011 | 2.011 | 1.992 | 1.992 | 1.990        | 83.137              |
| 0.6425 <b>1</b> <sub>opt</sub> | 1.978 | 1.978 | 2.018 | 2.018 | 1.999 | 1.999 | 1.998        | 81.154              |

**Table S3:** Geometrical parameters of **2** in the presence of an Oriented External Electric Field

| High spin                      |       |       |       |       |       |       |              |                     |
|--------------------------------|-------|-------|-------|-------|-------|-------|--------------|---------------------|
| $F_z$ (V/Å)                    | Fe-N1 | Fe-N2 | Fe-N3 | Fe-N4 | Fe-N5 | Fe-N6 | Average Fe-N | $\angle$ SCN-Fe-NCS |
| <b>2</b> <sub>xray</sub>       | 2.021 | 2.02  | 2.246 | 2.243 | 2.178 | 2.172 | 2.147        | 98.395              |
| <b>2</b> <sub>opt</sub>        | 2.051 | 2.051 | 2.249 | 2.249 | 2.192 | 2.192 | 2.164        | 97.888              |
| 0.1285 <b>2</b> <sub>opt</sub> | 2.085 | 2.085 | 2.242 | 2.242 | 2.187 | 2.187 | 2.171        | 91.319              |
| 0.2570 <b>2</b> <sub>opt</sub> | 2.128 | 2.128 | 2.235 | 2.235 | 2.182 | 2.182 | 2.181        | 86.683              |
| 0.3855 <b>2</b> <sub>opt</sub> | 2.184 | 2.184 | 2.227 | 2.227 | 2.176 | 2.176 | 2.196        | 82.488              |
| 0.5140 <b>2</b> <sub>opt</sub> | 2.269 | 2.269 | 2.212 | 2.212 | 2.171 | 2.171 | 2.217        | 78.063              |
| 0.6425 <b>2</b> <sub>opt</sub> | 2.502 | 2.501 | 2.177 | 2.176 | 2.149 | 2.149 | 2.276        | 70.529              |

**Table S4:** Geometrical parameters of **2** in the presence of an Oriented External Electric Field

| Low spin                         |       |       |       |       |       |       |              |                     |
|----------------------------------|-------|-------|-------|-------|-------|-------|--------------|---------------------|
| $F_z$ (V/Å)                      | Fe-N1 | Fe-N2 | Fe-N3 | Fe-N4 | Fe-N5 | Fe-N6 | Average Fe-N | $\angle$ SCN-Fe-NCS |
| $\mathbf{2}_{\text{xray}}$       | 1.913 | 1.913 | 1.944 | 1.944 | 1.942 | 1.943 | 1.933        | 89.561              |
| $\mathbf{2}_{\text{opt}}$        | 1.929 | 1.929 | 1.962 | 1.962 | 1.957 | 1.957 | 1.949        | 90.256              |
| 0.1285 $\mathbf{2}_{\text{opt}}$ | 1.937 | 1.937 | 1.966 | 1.966 | 1.960 | 1.960 | 1.954        | 88.198              |
| 0.2570 $\mathbf{2}_{\text{opt}}$ | 1.947 | 1.947 | 1.971 | 1.971 | 1.964 | 1.964 | 1.961        | 86.182              |
| 0.3855 $\mathbf{2}_{\text{opt}}$ | 1.959 | 1.959 | 1.978 | 1.978 | 1.968 | 1.968 | 1.968        | 84.627              |
| 0.5140 $\mathbf{2}_{\text{opt}}$ | 1.972 | 1.972 | 1.985 | 1.985 | 1.974 | 1.974 | 1.977        | 82.908              |
| 0.6425 $\mathbf{2}_{\text{opt}}$ | 1.987 | 1.987 | 1.994 | 1.994 | 1.980 | 1.980 | 1.987        | 80.990              |

**Table S5:** Geometrical parameters of **3** in the presence of an Oriented External Electric Field

| High spin                        |       |       |       |       |       |       |              |                     |
|----------------------------------|-------|-------|-------|-------|-------|-------|--------------|---------------------|
| $F_z$ (V/Å)                      | Fe-N1 | Fe-N2 | Fe-N3 | Fe-N4 | Fe-N5 | Fe-N6 | Average Fe-N | $\angle$ SCN-Fe-NCS |
| $\mathbf{3}_{\text{xray}}$       | 2.034 | 2.062 | 2.277 | 2.248 | 2.243 | 2.172 | 2.173        | 97.999              |
| $\mathbf{3}_{\text{opt}}$        | 2.063 | 2.090 | 2.294 | 2.259 | 2.233 | 2.202 | 2.190        | 97.755              |
| 0.1285 $\mathbf{3}_{\text{opt}}$ | 2.102 | 2.114 | 2.291 | 2.258 | 2.233 | 2.208 | 2.201        | 90.295              |
| 0.2570 $\mathbf{3}_{\text{opt}}$ | 2.141 | 2.159 | 2.276 | 2.249 | 2.229 | 2.210 | 2.211        | 86.045              |
| 0.3855 $\mathbf{3}_{\text{opt}}$ | 2.190 | 2.225 | 2.253 | 2.241 | 2.226 | 2.210 | 2.224        | 81.919              |
| 0.5140 $\mathbf{3}_{\text{opt}}$ | 2.239 | 2.359 | 2.225 | 2.236 | 2.222 | 2.207 | 2.248        | 77.012              |
| 0.6425 $\mathbf{3}_{\text{opt}}$ | 2.375 | 2.523 | 2.203 | 2.203 | 2.218 | 2.192 | 2.285        | 72.272              |

**Table S6:** Geometrical parameters of **3** in the presence of an Oriented External Electric Field

| Low spin                         |       |       |       |       |       |       |              |                     |
|----------------------------------|-------|-------|-------|-------|-------|-------|--------------|---------------------|
| $F_z$ (V/Å)                      | Fe-N1 | Fe-N2 | Fe-N3 | Fe-N4 | Fe-N5 | Fe-N6 | Average Fe-N | $\angle$ SCN-Fe-NCS |
| $\mathbf{3}_{\text{xray}}$       | 1.912 | 1.920 | 1.998 | 1.975 | 1.988 | 1.968 | 1.960        | 89.968              |
| $\mathbf{3}_{\text{opt}}$        | 1.931 | 1.937 | 2.010 | 1.998 | 2.008 | 1.983 | 1.978        | 90.307              |
| 0.1285 $\mathbf{3}_{\text{opt}}$ | 1.938 | 1.942 | 2.017 | 2.004 | 2.005 | 1.986 | 1.982        | 88.248              |
| 0.2570 $\mathbf{3}_{\text{opt}}$ | 1.947 | 1.951 | 2.024 | 2.014 | 2.004 | 1.989 | 1.988        | 86.483              |
| 0.3855 $\mathbf{3}_{\text{opt}}$ | 1.958 | 1.960 | 2.032 | 2.022 | 2.007 | 1.992 | 1.995        | 84.593              |
| 0.5140 $\mathbf{3}_{\text{opt}}$ | 1.969 | 1.972 | 2.039 | 2.030 | 2.011 | 1.997 | 2.003        | 83.090              |
| 0.6425 $\mathbf{3}_{\text{opt}}$ | 1.983 | 1.985 | 2.046 | 2.039 | 2.018 | 2.003 | 2.012        | 81.243              |

**Table S7:**  $t_{2g}$ - $e_g$  gap of complex **1,2** and **3** in presence of OEEFs.

| $F_z$ (V/Å)                      | LS   | HS   |
|----------------------------------|------|------|
| $\mathbf{1}_{\text{opt}}$        | 4.14 | 1.18 |
| 0.1285 $\mathbf{1}_{\text{opt}}$ | 4.26 | 1.17 |
| 0.2570 $\mathbf{1}_{\text{opt}}$ | 4.24 | 0.42 |

|                                |      |      |
|--------------------------------|------|------|
| 0.3855 <b>1</b> <sub>opt</sub> | 4.12 | 0.56 |
| 0.5140 <b>1</b> <sub>opt</sub> | 4.10 | 0.62 |
| 0.6425 <b>1</b> <sub>opt</sub> | 3.95 | 0.49 |
| <b>2</b> <sub>opt</sub>        | 3.90 | 1.40 |
| 0.1285 <b>2</b> <sub>opt</sub> | 4.03 | 1.18 |
| 0.2570 <b>2</b> <sub>opt</sub> | 4.02 | 1.30 |
| 0.3855 <b>2</b> <sub>opt</sub> | 4.01 | 1.19 |
| 0.5140 <b>2</b> <sub>opt</sub> | 3.89 | 0.62 |
| 0.6425 <b>2</b> <sub>opt</sub> | 3.71 | 0.51 |
| <b>3</b> <sub>opt</sub>        | 4.15 | 1.08 |
| 0.1285 <b>3</b> <sub>opt</sub> | 4.23 | 1.00 |
| 0.2570 <b>3</b> <sub>opt</sub> | 4.21 | 0.97 |
| 0.3855 <b>3</b> <sub>opt</sub> | 4.12 | 0.98 |
| 0.5140 <b>3</b> <sub>opt</sub> | 4.08 | 1.03 |
| 0.6425 <b>3</b> <sub>opt</sub> | 3.95 | 0.68 |

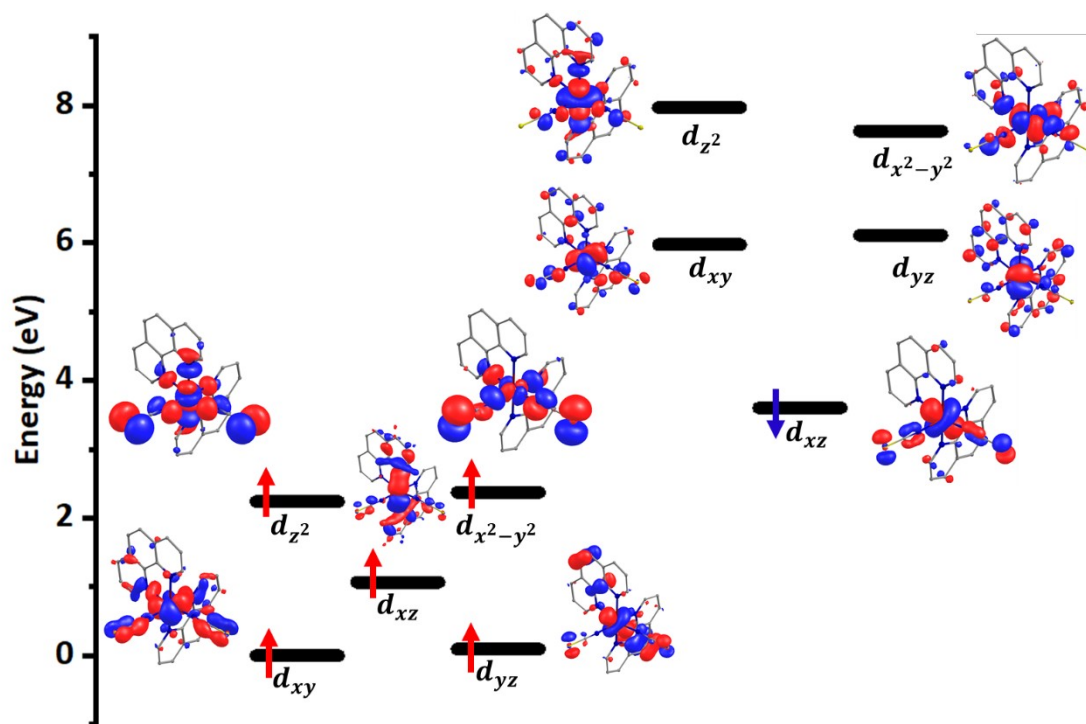

Figure S1: *d* orbital splitting diagram of complex 1 in High Spin

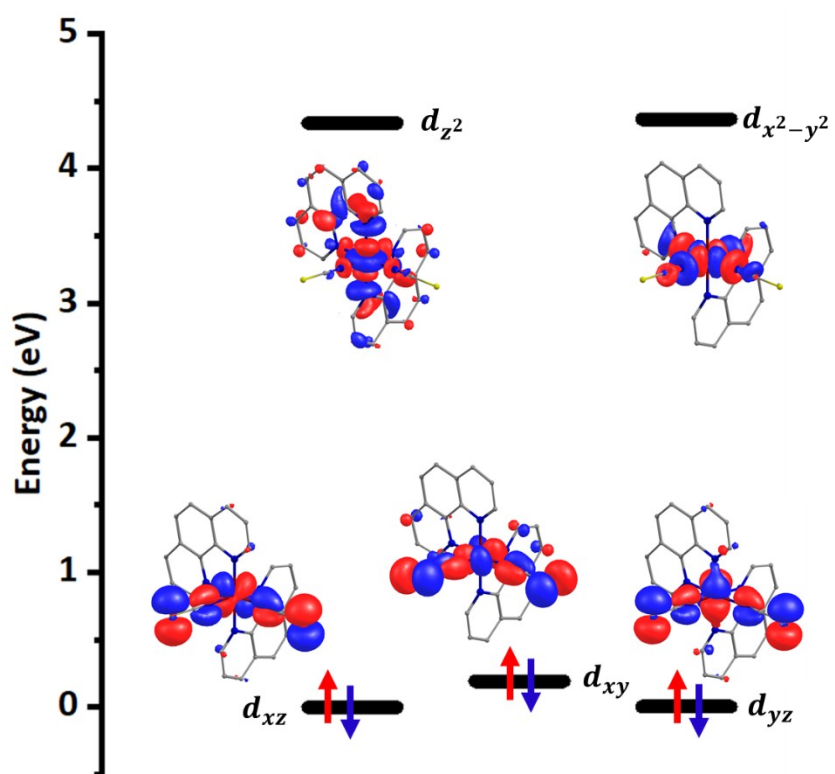

Figure S2: *d* orbital splitting diagram of complex 1 in Low Spin

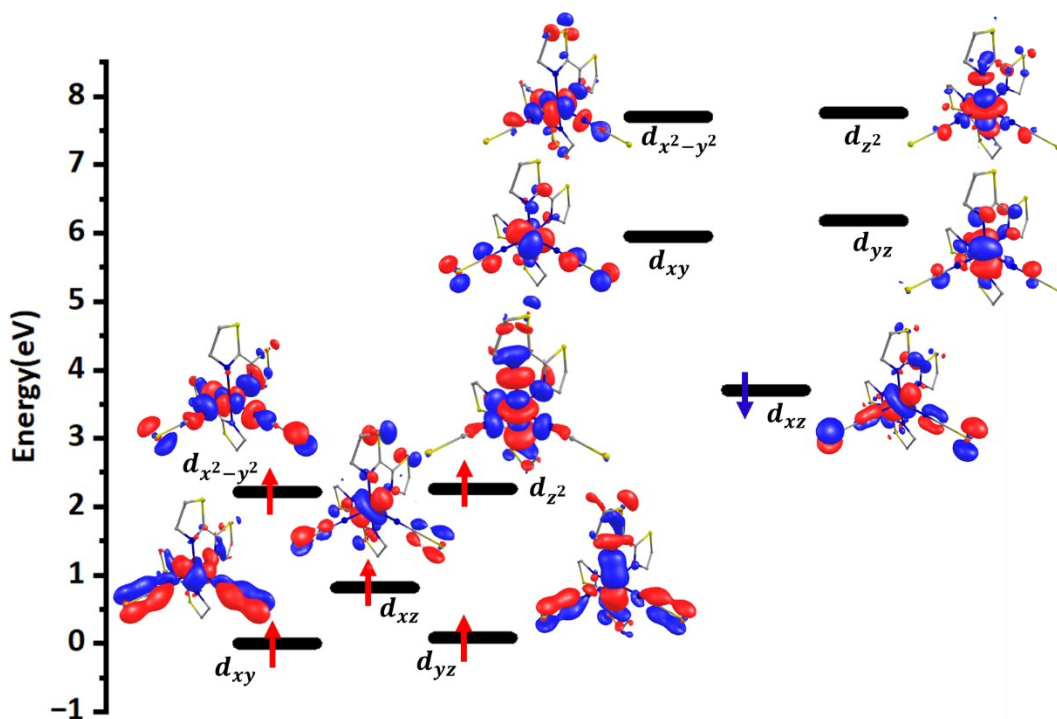

Figure S3: *d* orbital splitting diagram of complex 2 in High Spin

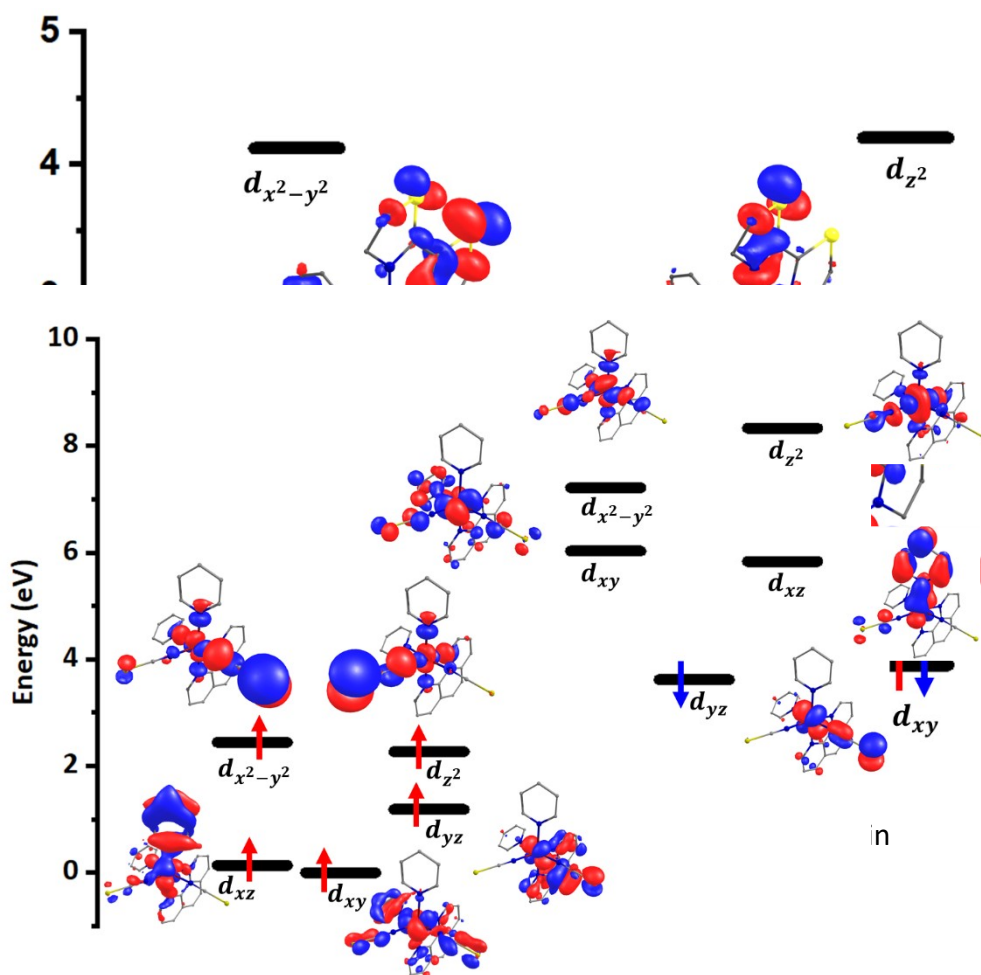

Figure S5: *d* orbital splitting diagram of complex 3 in High Spin

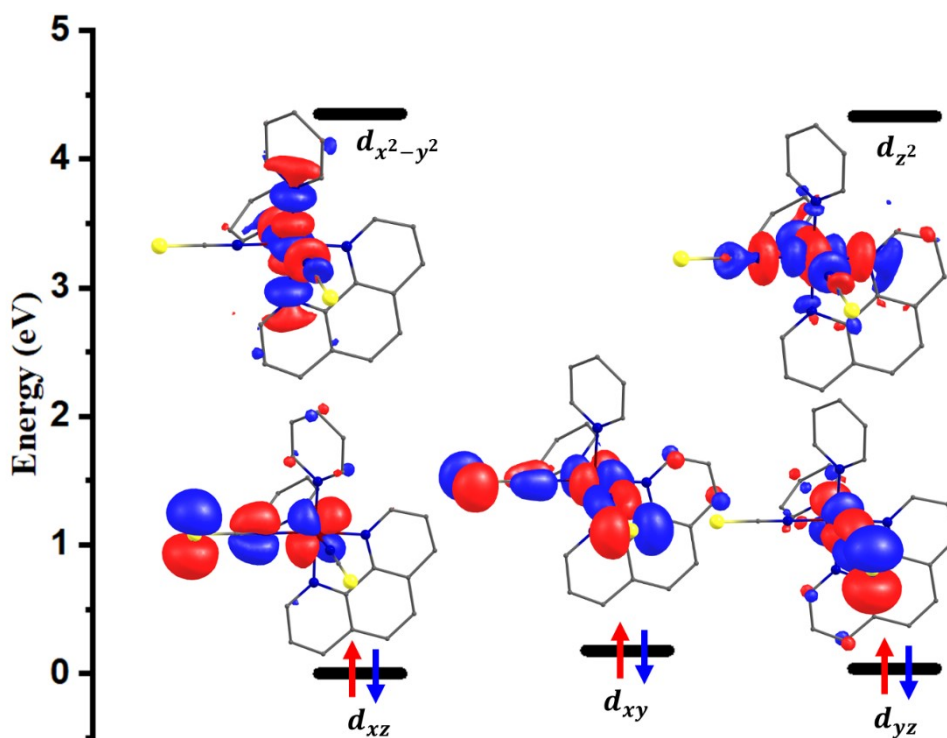

Figure S6: d orbital splitting diagram of complex **3** in Low Spin

Table S8: Energy parameters of **1** in the presence of an Oriented External Electric Field

| $F_z$ (V/Å)                    | $\Delta E_{HL}$ (kJ mol <sup>-1</sup> ) | $\Delta H_{HL}$ (kJ mol <sup>-1</sup> ) | $\Delta S_{HL}$ (kJ mol <sup>-1</sup> K <sup>-1</sup> ) | $\Delta ZPE_{HL}$ (kJ mol <sup>-1</sup> ) |
|--------------------------------|-----------------------------------------|-----------------------------------------|---------------------------------------------------------|-------------------------------------------|
| <b>1</b> <sub>xray</sub>       | 35.426                                  | -5.170                                  | 0.0952                                                  | -11.074                                   |
| <b>1</b> <sub>opt</sub>        | 35.553                                  | -5.238                                  | 0.0863                                                  | -10.951                                   |
| 0.1285 <b>1</b> <sub>opt</sub> | 33.694                                  | -5.038                                  | 0.0836                                                  | -10.633                                   |
| 0.2570 <b>1</b> <sub>opt</sub> | 27.364                                  | -4.918                                  | 0.0832                                                  | -10.536                                   |
| 0.3855 <b>1</b> <sub>opt</sub> | 18.602                                  | -4.550                                  | 0.0730                                                  | -9.985                                    |
| 0.5140 <b>1</b> <sub>opt</sub> | 9.258                                   | -4.755                                  | 0.0769                                                  | -10.576                                   |
| 0.6425 <b>1</b> <sub>opt</sub> | -5.217                                  | -7.265                                  | 0.0723                                                  | -11.374                                   |

Table S9: Energy parameters of **2** in the presence of an Oriented External Electric Field

| $F_z$ (V/Å)                    | $\Delta E_{HL}$ (kJ mol <sup>-1</sup> ) | $\Delta H_{HL}$ (kJ mol <sup>-1</sup> ) | $\Delta S_{HL}$ (kJ mol <sup>-1</sup> K <sup>-1</sup> ) | $\Delta ZPE_{HL}$ (kJ mol <sup>-1</sup> ) |
|--------------------------------|-----------------------------------------|-----------------------------------------|---------------------------------------------------------|-------------------------------------------|
| <b>2</b> <sub>xray</sub>       | 26.695                                  | -6.133                                  | 0.023                                                   | -11.512                                   |
| <b>2</b> <sub>opt</sub>        | 27.156                                  | -6.083                                  | 0.083                                                   | -11.707                                   |
| 0.1285 <b>2</b> <sub>opt</sub> | 26.115                                  | -5.833                                  | 0.091                                                   | -11.549                                   |

|                                  |         |        |       |         |
|----------------------------------|---------|--------|-------|---------|
| 0.2570 $\mathbf{2}_{\text{opt}}$ | 21.319  | -5.749 | 0.085 | -11.541 |
| 0.3855 $\mathbf{2}_{\text{opt}}$ | 13.818  | -5.264 | 0.078 | -10.767 |
| 0.5140 $\mathbf{2}_{\text{opt}}$ | 3.791   | -4.904 | 0.062 | -9.921  |
| 0.6425 $\mathbf{2}_{\text{opt}}$ | -10.040 | 10.268 | 0.066 | -12.15  |

**Table S10:** Energy parameters of **3** in the presence of an Oriented External Electric Field

| $F_z$ (V/Å)                      | $\Delta E_{\text{HL}}$ (kJ mol <sup>-1</sup> ) | $\Delta H_{\text{HL}}$ (kJ mol <sup>-1</sup> ) | $\Delta S_{\text{HL}}$ (kJ mol <sup>-1</sup> K <sup>-1</sup> ) | $\Delta ZPE_{\text{HL}}$ (kJ mol <sup>-1</sup> ) |
|----------------------------------|------------------------------------------------|------------------------------------------------|----------------------------------------------------------------|--------------------------------------------------|
| $\mathbf{3}_{\text{xray}}$       | 27.267                                         | -5.997                                         | 0.082                                                          | -12.369                                          |
| $\mathbf{3}_{\text{opt}}$        | 26.803                                         | -4.920                                         | 0.096                                                          | -11.389                                          |
| 0.1285 $\mathbf{3}_{\text{opt}}$ | 25.681                                         | -5.114                                         | 0.099                                                          | -11.791                                          |
| 0.2570 $\mathbf{3}_{\text{opt}}$ | 19.952                                         | -5.083                                         | 0.093                                                          | -11.586                                          |
| 0.3855 $\mathbf{3}_{\text{opt}}$ | 11.685                                         | -4.970                                         | 0.089                                                          | -11.418                                          |
| 0.5140 $\mathbf{3}_{\text{opt}}$ | -0.507                                         | -4.826                                         | 0.083                                                          | -11.122                                          |
| 0.6425 $\mathbf{3}_{\text{opt}}$ | -16.218                                        | -7.078                                         | 0.067                                                          | -11.177                                          |

**Table S11:** DFT computed HS-LS energy gap ( $\Delta U_{\text{HL}}$ ) for complex **2** at various oriented external electric fields using several functionals.

|              | 0% HF  | 0% HF  | 10% HF   | 15% HF | 20% HF  | 25% HF  |
|--------------|--------|--------|----------|--------|---------|---------|
| $+F_z$ (V/Å) | PBE    | BLYP   | TPSSh    | B3LYP* | B3LYP   | PBE0    |
| <b>Opt</b>   | 65.446 | 53.120 | 15.44973 | 48.268 | -30.071 | -57.694 |
| 0.1285       | 68.684 | 61.581 | 14.5662  | 50.729 | -27.493 | -58.055 |
| 0.2570       | 64.112 | 58.208 | 9.77781  | 48.942 | -32.052 | -63.486 |
| 0.3855       | 58.234 | 51.004 | 3.05102  | 42.616 | -39.125 | -71.219 |
| 0.514        | 48.560 | 41.828 | -6.13081 | 34.081 | -48.291 | -80.953 |

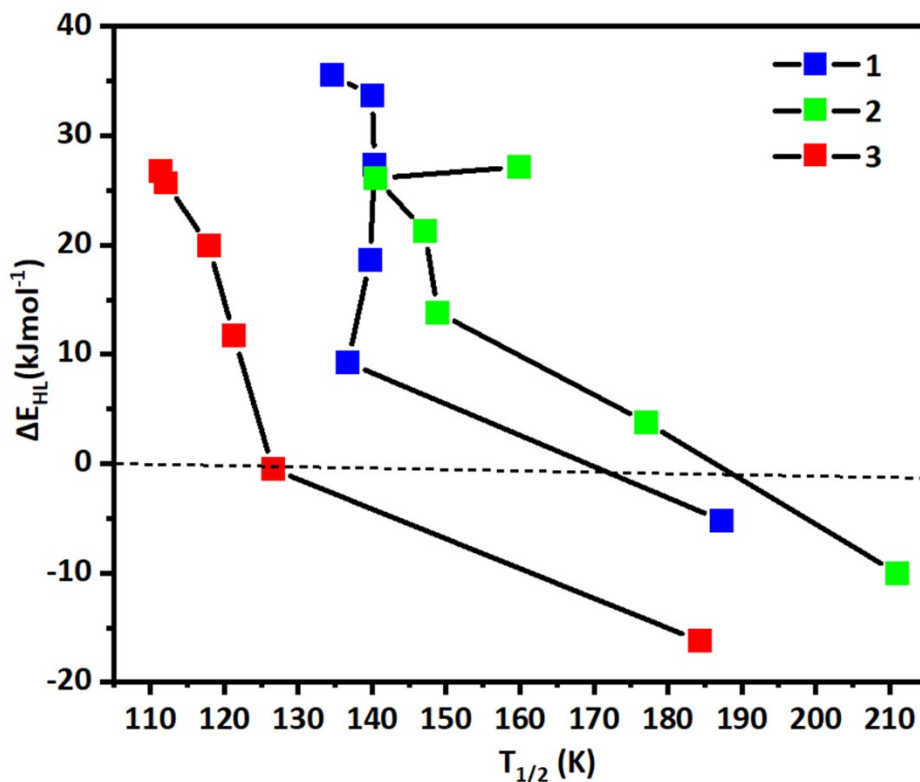

Figure S7.  $\Delta E_{HL}$  vs  $T_{1/2}$  for complexes 1, 2 and 3.

Table S12: A few selected parameters of 1 in HS and LS state adsorbed on Au(111) surface

|                           | Fe-N1 | Fe-N2 | Fe-N3 | Fe-N4 | Fe-N5 | Fe-N6 | Average Fe-N | Au-S1 | Au-S2 |
|---------------------------|-------|-------|-------|-------|-------|-------|--------------|-------|-------|
| $\mathbf{1}_{HS}@Au(111)$ | 1.920 | 1.913 | 1.939 | 1.937 | 2.107 | 2.090 | 1.984        | 2.861 | 2.921 |
| $\mathbf{1}_{LS}@Au(111)$ | 1.936 | 1.906 | 1.964 | 1.957 | 1.967 | 1.966 | 1.950        | 2.517 | 2.580 |

Table S13: A few selected parameters of 1 in HS and LS state adsorbed on Au(111) surface

|                           | S-S   | N-Fe-N | S-Fe-S  |
|---------------------------|-------|--------|---------|
| $\mathbf{1}_{HS}$         | 7.361 | 97.353 | 98.010  |
| $\mathbf{1}_{LS}$         | 6.778 | 90.833 | 91.057  |
| $\mathbf{1}_{HS}@Au(111)$ | 7.687 | 90.988 | 105.295 |
| $\mathbf{1}_{LS}@Au(111)$ | 8.144 | 99.282 | 123.852 |

## Geometrical Coordinates

$HS\mathbf{1}_{opt}$

Fe 0.00000000 0.00000000 0.00000000



|   |              |              |              |
|---|--------------|--------------|--------------|
| N | -1.854350000 | 1.134940000  | -0.326700000 |
| N | -1.080210000 | -1.083070000 | -1.665460000 |
| N | -0.738060000 | -1.363040000 | 1.362900000  |
| C | -2.708780000 | 0.624880000  | -1.251580000 |
| C | -2.293020000 | -0.554730000 | -1.969230000 |
| C | -2.226700000 | 2.209420000  | 0.367670000  |
| C | -3.468630000 | 2.845260000  | 0.178290000  |
| C | -4.345320000 | 2.345740000  | -0.770940000 |
| C | -3.978860000 | 1.202600000  | -1.521190000 |
| C | -4.825210000 | 0.608130000  | -2.519190000 |
| C | -4.430400000 | -0.509150000 | -3.202900000 |
| C | -3.157930000 | -1.125020000 | -2.942840000 |
| C | -2.709290000 | -2.294000000 | -3.603500000 |
| C | -1.472980000 | -2.826020000 | -3.276550000 |
| C | -0.688310000 | -2.185340000 | -2.297200000 |
| C | -1.255000000 | -2.098940000 | 2.138460000  |
| S | -1.964690000 | -3.111670000 | 3.199430000  |
| H | -1.506350000 | 2.579540000  | 1.101010000  |
| H | -3.720640000 | 3.721950000  | 0.776410000  |
| H | -5.314000000 | 2.818960000  | -0.945590000 |
| H | -5.796330000 | 1.066420000  | -2.717560000 |
| H | -5.080960000 | -0.957630000 | -3.956610000 |
| H | -3.342160000 | -2.764880000 | -4.358940000 |
| H | -1.097430000 | -3.727760000 | -3.762200000 |
| H | 0.290040000  | -2.586150000 | -2.021360000 |
| N | 1.854240000  | -1.135140000 | -0.326940000 |
| N | 1.080050000  | 1.082940000  | -1.665530000 |
| N | 0.738060000  | 1.363040000  | 1.362840000  |
| C | 2.708550000  | -0.625150000 | -1.251960000 |
| C | 2.226620000  | -2.209630000 | 0.367380000  |
| C | 2.292750000  | 0.554500000  | -1.969540000 |
| C | 0.688110000  | 2.185250000  | -2.297180000 |

|   |              |              |              |
|---|--------------|--------------|--------------|
| C | 1.255150000  | 2.099360000  | 2.137900000  |
| C | 3.978540000  | -1.202950000 | -1.521790000 |
| C | 3.468480000  | -2.845560000 | 0.177800000  |
| H | 1.506360000  | -2.579700000 | 1.100840000  |
| C | 3.157520000  | 1.124730000  | -2.943310000 |
| C | 1.472650000  | 2.825870000  | -3.276680000 |
| H | -0.290150000 | 2.586130000  | -2.021130000 |
| S | 1.965100000  | 3.112560000  | 3.198240000  |
| C | 4.345040000  | -2.346110000 | -0.771590000 |
| C | 4.824760000  | -0.608550000 | -2.519950000 |
| H | 3.720540000  | -3.722260000 | 0.775890000  |
| C | 4.429900000  | 0.508750000  | -3.203600000 |
| C | 2.708850000  | 2.293740000  | -3.603880000 |
| H | 1.097090000  | 3.727650000  | -3.762240000 |
| H | 5.313650000  | -2.819420000 | -0.946410000 |
| H | 5.795810000  | -1.066900000 | -2.718480000 |
| H | 5.080360000  | 0.957170000  | -3.957440000 |
| H | 3.341620000  | 2.764590000  | -4.359430000 |

LS<sub>1opt</sub>

|    |              |              |              |
|----|--------------|--------------|--------------|
| Fe | 0.000000000  | 0.000000000  | 0.000000000  |
| N  | -1.643610000 | 1.094600000  | -0.056410000 |
| N  | -0.944200000 | -1.042850000 | -1.393040000 |
| N  | -0.809820000 | -1.111030000 | 1.354990000  |
| C  | -2.572680000 | 0.609010000  | -0.927210000 |
| C  | -2.187580000 | -0.551240000 | -1.662980000 |
| C  | -1.963260000 | 2.169290000  | 0.668730000  |
| C  | -3.210560000 | 2.812800000  | 0.550170000  |
| C  | -4.157060000 | 2.333840000  | -0.343060000 |
| C  | -3.849030000 | 1.191640000  | -1.119860000 |
| C  | -4.736760000 | 0.590230000  | -2.078470000 |
| C  | -4.365410000 | -0.520640000 | -2.789750000 |
| C  | -3.075700000 | -1.129940000 | -2.602420000 |

|   |              |              |              |
|---|--------------|--------------|--------------|
| C | -2.623080000 | -2.280260000 | -3.291560000 |
| C | -1.357640000 | -2.773100000 | -3.012240000 |
| C | -0.547130000 | -2.131020000 | -2.056230000 |
| C | -1.352450000 | -1.758850000 | 2.182660000  |
| S | -2.091320000 | -2.668390000 | 3.326710000  |
| H | -1.201200000 | 2.527070000  | 1.361890000  |
| H | -3.413360000 | 3.687960000  | 1.168880000  |
| H | -5.127680000 | 2.822460000  | -0.449440000 |
| H | -5.720560000 | 1.039000000  | -2.229830000 |
| H | -5.050170000 | -0.966440000 | -3.513950000 |
| H | -3.266880000 | -2.766120000 | -4.027460000 |
| H | -0.973120000 | -3.658750000 | -3.519730000 |
| H | 0.445930000  | -2.516490000 | -1.823310000 |
| N | 1.643620000  | -1.094600000 | -0.056410000 |
| N | 0.944210000  | 1.042860000  | -1.393020000 |
| N | 0.809820000  | 1.111030000  | 1.354990000  |
| C | 2.572690000  | -0.609000000 | -0.927190000 |
| C | 1.963260000  | -2.169290000 | 0.668740000  |
| C | 2.187590000  | 0.551250000  | -1.662960000 |
| C | 0.547140000  | 2.131030000  | -2.056220000 |
| C | 1.352440000  | 1.758750000  | 2.182740000  |
| C | 3.849040000  | -1.191630000 | -1.119840000 |
| C | 3.210570000  | -2.812790000 | 0.550170000  |
| H | 1.201200000  | -2.527080000 | 1.361880000  |
| C | 3.075720000  | 1.129950000  | -2.602400000 |
| C | 1.357650000  | 2.773110000  | -3.012230000 |
| H | -0.445920000 | 2.516500000  | -1.823300000 |
| S | 2.090690000  | 2.666860000  | 3.328320000  |
| C | 4.157070000  | -2.333830000 | -0.343050000 |
| C | 4.736780000  | -0.590210000 | -2.078440000 |
| H | 3.413370000  | -3.687960000 | 1.168890000  |
| C | 4.365430000  | 0.520660000  | -2.789720000 |

|   |             |              |              |
|---|-------------|--------------|--------------|
| C | 2.623090000 | 2.280280000  | -3.291550000 |
| H | 0.973130000 | 3.658760000  | -3.519720000 |
| H | 5.127700000 | -2.822440000 | -0.449410000 |
| H | 5.720580000 | -1.038980000 | -2.229800000 |
| H | 5.050190000 | 0.966460000  | -3.513920000 |
| H | 3.266900000 | 2.766130000  | -4.027440000 |

HS<sub>2</sub><sub>opt</sub>

|    |              |              |              |
|----|--------------|--------------|--------------|
| Fe | 0.000000000  | 0.000000000  | 0.000000000  |
| S  | 3.092640000  | -1.553060000 | -3.197930000 |
| S  | 4.166520000  | 1.303260000  | -1.675820000 |
| S  | -3.091490000 | 1.550570000  | -3.200120000 |
| S  | -4.166150000 | -1.304460000 | -1.676050000 |
| S  | -1.362220000 | 3.365020000  | 3.240250000  |
| S  | 1.363830000  | -3.365910000 | 3.238860000  |
| N  | 0.993140000  | -1.138800000 | -1.666420000 |
| N  | 1.917440000  | 1.003390000  | -0.347570000 |
| N  | -0.992890000 | 1.137730000  | -1.667000000 |
| N  | -1.917410000 | -1.003820000 | -0.347400000 |
| N  | -0.575710000 | 1.435220000  | 1.346820000  |
| N  | 0.575710000  | -1.435220000 | 1.346990000  |
| C  | 2.153930000  | -0.682620000 | -1.992560000 |
| C  | 1.589260000  | -2.557850000 | -3.567970000 |
| C  | 0.690670000  | -2.407430000 | -2.326680000 |
| C  | 2.647740000  | 0.510710000  | -1.291730000 |
| C  | 3.986360000  | 2.285110000  | -0.121720000 |
| C  | 2.486610000  | 2.226680000  | 0.218400000  |
| C  | -2.153440000 | 0.681180000  | -1.993500000 |
| C  | -1.587980000 | 2.555220000  | -3.570030000 |
| C  | -0.690120000 | 2.405860000  | -2.328080000 |
| C  | -2.647460000 | -0.511710000 | -1.292050000 |
| C  | -3.986390000 | -2.285420000 | -0.121340000 |
| C  | -2.486740000 | -2.226740000 | 0.219190000  |

|   |              |              |              |
|---|--------------|--------------|--------------|
| C | -0.907500000 | 2.248390000  | 2.146130000  |
| C | 0.907930000  | -2.248650000 | 2.145840000  |
| H | 1.891350000  | -3.596100000 | -3.752170000 |
| H | 1.125000000  | -2.144990000 | -4.474680000 |
| H | 0.875500000  | -3.211760000 | -1.593320000 |
| H | -0.372060000 | -2.447150000 | -2.604360000 |
| H | 4.344360000  | 3.305980000  | -0.302590000 |
| H | 4.610460000  | 1.808660000  | 0.647300000  |
| H | 1.940400000  | 3.082560000  | -0.214940000 |
| H | 2.320690000  | 2.246010000  | 1.304120000  |
| H | -1.890070000 | 3.593290000  | -3.755240000 |
| H | -1.123130000 | 2.141670000  | -4.476120000 |
| H | -0.875450000 | 3.210770000  | -1.595480000 |
| H | 0.372760000  | 2.445450000  | -2.605170000 |
| H | -4.344300000 | -3.306400000 | -0.301720000 |
| H | -4.610730000 | -1.808550000 | 0.647230000  |
| H | -1.940380000 | -3.082890000 | -0.213440000 |
| H | -2.321140000 | -2.245370000 | 1.304970000  |

LS<sub>2opt</sub>

|    |              |              |              |
|----|--------------|--------------|--------------|
| Fe | 0.000000000  | 0.000000000  | 0.000000000  |
| S  | 3.198210000  | -1.394410000 | -2.755470000 |
| S  | 4.025310000  | 1.601790000  | -0.996510000 |
| S  | -3.198530000 | 1.394540000  | -2.754980000 |
| S  | -4.024640000 | -1.602770000 | -0.997480000 |
| S  | -2.002160000 | 2.685000000  | 3.364710000  |
| S  | 2.002920000  | -2.684260000 | 3.364870000  |
| N  | 1.005250000  | -0.988890000 | -1.364340000 |
| N  | 1.607580000  | 1.112950000  | -0.086200000 |
| N  | -1.005360000 | 0.989010000  | -1.364190000 |
| N  | -1.607320000 | -1.113210000 | -0.086480000 |
| N  | -0.794830000 | 1.112260000  | 1.360950000  |
| N  | 0.794830000  | -1.112260000 | 1.361000000  |

|                            |              |              |              |
|----------------------------|--------------|--------------|--------------|
| C                          | 2.190410000  | -0.520230000 | -1.624060000 |
| C                          | 1.716010000  | -2.400340000 | -3.216050000 |
| C                          | 0.747170000  | -2.265390000 | -2.031530000 |
| C                          | 2.538590000  | 0.686060000  | -0.887590000 |
| C                          | 3.490830000  | 2.539220000  | 0.506820000  |
| C                          | 1.965610000  | 2.366830000  | 0.581080000  |
| C                          | -2.190380000 | 0.520120000  | -1.624100000 |
| C                          | -1.716840000 | 2.401540000  | -3.214850000 |
| C                          | -0.747700000 | 2.265990000  | -2.030620000 |
| C                          | -2.538280000 | -0.686510000 | -0.888020000 |
| C                          | -3.490220000 | -2.540220000 | 0.505860000  |
| C                          | -1.965070000 | -2.367310000 | 0.580540000  |
| C                          | -1.305480000 | 1.768320000  | 2.201940000  |
| C                          | 1.305820000  | -1.768020000 | 2.202010000  |
| H                          | 2.032230000  | -3.435560000 | -3.391950000 |
| H                          | 1.303880000  | -1.978530000 | -4.143400000 |
| H                          | 0.903390000  | -3.064150000 | -1.285960000 |
| H                          | -0.297150000 | -2.313310000 | -2.368670000 |
| H                          | 3.795990000  | 3.586780000  | 0.395570000  |
| H                          | 4.004760000  | 2.096950000  | 1.371560000  |
| H                          | 1.439140000  | 3.189190000  | 0.067140000  |
| H                          | 1.612190000  | 2.342680000  | 1.619730000  |
| H                          | -2.033570000 | 3.436780000  | -3.389740000 |
| H                          | -1.304670000 | 1.980800000  | -4.142650000 |
| H                          | -0.903890000 | 3.064200000  | -1.284460000 |
| H                          | 0.296530000  | 2.314360000  | -2.367990000 |
| H                          | -3.794970000 | -3.587870000 | 0.394390000  |
| H                          | -4.004520000 | -2.098250000 | 1.370530000  |
| H                          | -1.438190000 | -3.189430000 | 0.066650000  |
| H                          | -1.611930000 | -2.343160000 | 1.619290000  |
| $\text{HS}_3_{\text{opt}}$ |              |              |              |
| Fe                         | 0.000000000  | 0.000000000  | 0.000000000  |

|   |              |              |              |
|---|--------------|--------------|--------------|
| N | 2.047050000  | -0.801140000 | -0.130300000 |
| N | 1.010100000  | 1.231770000  | -1.602250000 |
| N | -2.004390000 | 0.974650000  | -0.135910000 |
| N | -0.585870000 | -1.386330000 | -1.731280000 |
| C | 3.143440000  | 1.589330000  | -2.727510000 |
| C | 2.314140000  | 0.902890000  | -1.797440000 |
| C | -1.087330000 | -0.950930000 | -2.901040000 |
| C | 2.865150000  | -0.179360000 | -1.018430000 |
| C | 1.237250000  | 2.984640000  | -3.238210000 |
| C | -2.190430000 | 2.278310000  | 0.143700000  |
| C | 5.033860000  | 0.157930000  | -2.149430000 |
| C | 4.227290000  | -0.548080000 | -1.192500000 |
| C | 4.724180000  | -1.605480000 | -0.393490000 |
| C | 2.543950000  | -1.787950000 | 0.613510000  |
| C | 2.564470000  | 2.655680000  | -3.455710000 |
| C | 0.495470000  | 2.241810000  | -2.300060000 |
| C | -0.595140000 | -3.626330000 | -2.615450000 |
| C | 4.513400000  | 1.185590000  | -2.886470000 |
| C | -4.391520000 | 0.691780000  | -0.235020000 |
| C | -4.580910000 | 2.048940000  | 0.039990000  |
| C | -1.112270000 | -3.167250000 | -3.830150000 |
| C | -3.088980000 | 0.198850000  | -0.317020000 |
| C | -1.364600000 | -1.800020000 | -3.973290000 |
| C | -3.456880000 | 2.857090000  | 0.232850000  |
| C | -0.348650000 | -2.704180000 | -1.597340000 |
| C | 3.879440000  | -2.223100000 | 0.513800000  |
| S | 1.677580000  | 3.316110000  | 3.201290000  |
| S | -1.638390000 | -3.145600000 | 3.333030000  |
| N | 0.608560000  | 1.440720000  | 1.385990000  |
| N | -0.608560000 | -1.440720000 | 1.345110000  |
| C | -1.043340000 | -2.158860000 | 2.187160000  |
| C | 1.058570000  | 2.228020000  | 2.151150000  |

|   |              |              |              |
|---|--------------|--------------|--------------|
| H | 0.757690000  | 3.801850000  | -3.778430000 |
| H | -1.285850000 | 2.865640000  | 0.316100000  |
| H | 6.076790000  | -0.141470000 | -2.272460000 |
| H | 5.765280000  | -1.918600000 | -0.497370000 |
| H | 1.851990000  | -2.252150000 | 1.320560000  |
| H | -1.771890000 | -1.390350000 | -4.899120000 |
| H | 3.169470000  | 3.208320000  | -4.177770000 |
| H | -0.554590000 | 2.481840000  | -2.116800000 |
| H | -0.383390000 | -4.684320000 | -2.451580000 |
| H | 5.132680000  | 1.721680000  | -3.608660000 |
| H | -5.587010000 | 2.468460000  | 0.107860000  |
| H | -1.316410000 | -3.861300000 | -4.648300000 |
| H | -3.553190000 | 3.920670000  | 0.456910000  |
| H | 0.046120000  | -3.024170000 | -0.630660000 |
| H | -5.237240000 | 0.018740000  | -0.385100000 |
| H | 4.228550000  | -3.037430000 | 1.150210000  |
| H | -2.897410000 | -0.855440000 | -0.526730000 |
| H | -1.278360000 | 0.121660000  | -2.980270000 |

LS<sub>3</sub><sub>opt</sub>

|    |              |              |              |
|----|--------------|--------------|--------------|
| Fe | 0.000000000  | 0.000000000  | 0.000000000  |
| N  | 1.851330000  | -0.710690000 | 0.008360000  |
| N  | 0.750400000  | 1.215770000  | -1.397030000 |
| N  | -1.836120000 | 0.811130000  | 0.042660000  |
| N  | -0.531170000 | -1.312350000 | -1.426940000 |
| C  | 2.866960000  | 1.750840000  | -2.518940000 |
| C  | 2.083400000  | 1.002450000  | -1.604930000 |
| C  | -1.147150000 | -0.926240000 | -2.564950000 |
| C  | 2.682450000  | -0.041330000 | -0.837010000 |
| C  | 0.858040000  | 2.971690000  | -3.047610000 |
| C  | -2.021720000 | 2.125500000  | 0.295260000  |
| C  | 4.840520000  | 0.444910000  | -1.898510000 |
| C  | 4.064350000  | -0.327290000 | -0.966620000 |



|   |              |              |              |
|---|--------------|--------------|--------------|
| C | 4.587170000  | -1.362210000 | -0.154940000 |
| C | 2.374640000  | -1.670920000 | 0.772960000  |
| C | 2.212300000  | 2.766610000  | -3.254460000 |
| C | 0.164020000  | 2.178690000  | -2.114240000 |
| C | -0.552350000 | -3.576320000 | -2.254200000 |
| C | 4.265400000  | 1.439730000  | -2.643770000 |
| C | -4.230020000 | 0.526610000  | 0.066660000  |
| C | -4.416590000 | 1.889310000  | 0.311700000  |
| C | -1.180280000 | -3.168920000 | -3.433890000 |
| C | -2.933660000 | 0.029720000  | -0.057490000 |
| C | -1.484090000 | -1.813670000 | -3.584920000 |
| C | -3.284590000 | 2.699230000  | 0.431450000  |
| C | -0.248690000 | -2.625350000 | -1.281840000 |
| C | 3.736670000  | -2.025240000 | 0.715380000  |
| S | 1.570450000  | 2.937020000  | 3.394020000  |
| S | -1.472920000 | -2.938550000 | 3.428530000  |
| N | 0.576920000  | 1.244020000  | 1.368070000  |
| N | -0.576920000 | -1.244020000 | 1.359840000  |
| C | -0.959210000 | -1.949090000 | 2.230900000  |
| C | 0.996870000  | 1.949650000  | 2.219220000  |
| H | 0.312060000  | 3.741030000  | -3.594920000 |
| H | -1.117360000 | 2.723250000  | 0.408390000  |
| H | 5.904540000  | 0.222230000  | -2.000750000 |
| H | 5.645760000  | -1.622760000 | -0.215810000 |
| H | 1.689540000  | -2.170930000 | 1.458830000  |
| H | -1.980790000 | -1.436630000 | -4.480150000 |
| H | 2.772260000  | 3.371580000  | -3.970260000 |
| H | -0.901940000 | 2.340050000  | -1.950430000 |
| H | -0.296570000 | -4.622120000 | -2.077120000 |
| H | 4.864680000  | 2.019590000  | -3.348570000 |
| H | -5.419600000 | 2.308450000  | 0.414390000  |
| H | -1.430500000 | -3.890180000 | -4.214410000 |

|   |              |              |              |
|---|--------------|--------------|--------------|
| H | -3.367580000 | 3.768180000  | 0.633840000  |
| H | 0.227490000  | -2.913550000 | -0.345590000 |
| H | -5.075830000 | -0.156630000 | -0.024680000 |
| H | 4.102760000  | -2.821850000 | 1.364350000  |
| H | -2.755130000 | -1.031550000 | -0.229070000 |
| H | -1.383310000 | 0.133700000  | -2.655720000 |

<sup>HS</sup>**1@Au(111)**<sub>opt</sub>

|    |              |              |             |
|----|--------------|--------------|-------------|
| Au | 0.000000000  | 0.000000000  | 0.000000000 |
| Au | -2.949542000 | 5.108757000  | 0.000000000 |
| Au | -5.899085000 | 10.217514000 | 0.000000000 |
| Au | 5.899075000  | 0.000000000  | 0.000000000 |
| Au | 2.949532000  | 5.108757000  | 0.000000000 |
| Au | -0.000012000 | 10.217514000 | 0.000000000 |
| Au | 11.798149000 | 0.000000000  | 0.000000000 |
| Au | 8.848606000  | 5.108757000  | 0.000000000 |
| Au | 5.899062000  | 10.217514000 | 0.000000000 |
| Au | -1.474771000 | 2.554378000  | 0.000000000 |
| Au | -4.424314000 | 7.663137000  | 0.000000000 |
| Au | -7.373856000 | 12.771894000 | 0.000000000 |
| Au | 4.424303000  | 2.554378000  | 0.000000000 |
| Au | 1.474758000  | 7.663137000  | 0.000000000 |
| Au | -1.474785000 | 12.771894000 | 0.000000000 |
| Au | 10.323377000 | 2.554378000  | 0.000000000 |
| Au | 7.373833000  | 7.663137000  | 0.000000000 |
| Au | 4.424291000  | 12.771894000 | 0.000000000 |
| Au | 2.949537000  | 0.000000000  | 0.000000000 |
| Au | -0.000006000 | 5.108757000  | 0.000000000 |
| Au | -2.949549000 | 10.217514000 | 0.000000000 |
| Au | 8.848614000  | 0.000000000  | 0.000000000 |
| Au | 5.899071000  | 5.108757000  | 0.000000000 |
| Au | 2.949529000  | 10.217514000 | 0.000000000 |
| Au | 14.747688000 | 0.000000000  | 0.000000000 |

|    |              |              |             |
|----|--------------|--------------|-------------|
| Au | 11.798146000 | 5.108757000  | 0.000000000 |
| Au | 8.848602000  | 10.217514000 | 0.000000000 |
| Au | 1.474766000  | 2.554378000  | 0.000000000 |
| Au | -1.474779000 | 7.663137000  | 0.000000000 |
| Au | -4.424321000 | 12.771894000 | 0.000000000 |
| Au | 7.373843000  | 2.554378000  | 0.000000000 |
| Au | 4.424298000  | 7.663137000  | 0.000000000 |
| Au | 1.474756000  | 12.771894000 | 0.000000000 |
| Au | 13.272917000 | 2.554378000  | 0.000000000 |
| Au | 10.323372000 | 7.663137000  | 0.000000000 |
| Au | 7.373830000  | 12.771894000 | 0.000000000 |
| Au | 1.474789000  | 0.851469000  | 2.408288000 |
| Au | -1.474755000 | 5.960227000  | 2.408288000 |
| Au | -4.424299000 | 11.068983000 | 2.408288000 |
| Au | 7.373864000  | 0.851469000  | 2.408288000 |
| Au | 4.424322000  | 5.960227000  | 2.408288000 |
| Au | 1.474778000  | 11.068983000 | 2.408288000 |
| Au | 13.272939000 | 0.851469000  | 2.408288000 |
| Au | 10.323396000 | 5.960227000  | 2.408288000 |
| Au | 7.373853000  | 11.068983000 | 2.408288000 |
| Au | 0.000017000  | 3.405848000  | 2.408288000 |
| Au | -2.949526000 | 8.514602000  | 2.408288000 |
| Au | -5.899071000 | 13.623364000 | 2.408288000 |
| Au | 5.899093000  | 3.405848000  | 2.408288000 |
| Au | 2.949550000  | 8.514602000  | 2.408288000 |
| Au | 0.000005000  | 13.623364000 | 2.408288000 |
| Au | 11.798166000 | 3.405848000  | 2.408288000 |
| Au | 8.848626000  | 8.514602000  | 2.408288000 |
| Au | 5.899080000  | 13.623364000 | 2.408288000 |
| Au | 4.424325000  | 0.851469000  | 2.408288000 |
| Au | 1.474782000  | 5.960227000  | 2.408288000 |
| Au | -1.474761000 | 11.068983000 | 2.408288000 |

|    |              |              |             |
|----|--------------|--------------|-------------|
| Au | 10.323399000 | 0.851469000  | 2.408288000 |
| Au | 7.373856000  | 5.960227000  | 2.408288000 |
| Au | 4.424313000  | 11.068983000 | 2.408288000 |
| Au | 16.222478000 | 0.851469000  | 2.408288000 |
| Au | 13.272936000 | 5.960227000  | 2.408288000 |
| Au | 10.323393000 | 11.068983000 | 2.408288000 |
| Au | 2.949553000  | 3.405848000  | 2.408288000 |
| Au | 0.000011000  | 8.514602000  | 2.408288000 |
| Au | -2.949535000 | 13.623364000 | 2.408288000 |
| Au | 8.848626000  | 3.405848000  | 2.408288000 |
| Au | 5.899086000  | 8.514602000  | 2.408288000 |
| Au | 2.949540000  | 13.623364000 | 2.408288000 |
| Au | 14.747706000 | 3.405848000  | 2.408288000 |
| Au | 11.798165000 | 8.514602000  | 2.408288000 |
| Au | 8.848619000  | 13.623364000 | 2.408288000 |
| Au | -0.022616000 | 1.654148000  | 4.796401000 |
| Au | -2.971844000 | 6.810778000  | 4.796850000 |
| Au | -5.906402000 | 11.905682000 | 4.799448000 |
| Au | 5.911992000  | 1.689176000  | 4.807148000 |
| Au | 2.968163000  | 6.794069000  | 4.740280000 |
| Au | -0.019402000 | 11.918592000 | 4.817812000 |
| Au | 11.789354000 | 1.730364000  | 4.809846000 |
| Au | 8.857921000  | 6.816291000  | 4.822719000 |
| Au | 5.933822000  | 11.860655000 | 4.818700000 |
| Au | -1.478300000 | 4.247684000  | 4.786242000 |
| Au | -4.427706000 | 9.367034000  | 4.794368000 |
| Au | -7.383163000 | 14.439379000 | 4.805344000 |
| Au | 4.490224000  | 4.225078000  | 4.775256000 |
| Au | 1.465203000  | 9.372968000  | 4.818707000 |
| Au | -1.476958000 | 14.473254000 | 4.794542000 |
| Au | 10.338878000 | 4.261661000  | 4.813233000 |
| Au | 7.384714000  | 9.336603000  | 4.813089000 |

|    |              |              |              |
|----|--------------|--------------|--------------|
| Au | 4.402970000  | 14.555687000 | 4.745431000  |
| Au | 2.976466000  | 1.626951000  | 4.789472000  |
| Au | -0.073080000 | 6.876469000  | 4.773796000  |
| Au | -2.938679000 | 11.913222000 | 4.802610000  |
| Au | 8.849269000  | 1.707670000  | 4.796057000  |
| Au | 5.938209000  | 6.781607000  | 4.817590000  |
| Au | 2.883065000  | 11.921474000 | 4.789943000  |
| Au | 14.748649000 | 1.717895000  | 4.816366000  |
| Au | 11.796707000 | 6.814220000  | 4.793448000  |
| Au | 8.858447000  | 11.910568000 | 4.811579000  |
| Au | 1.510061000  | 4.125362000  | 4.749086000  |
| Au | -1.483443000 | 9.393214000  | 4.826590000  |
| Au | -4.416458000 | 14.444448000 | 4.798073000  |
| Au | 7.409847000  | 4.253316000  | 4.809259000  |
| Au | 4.420056000  | 9.277418000  | 4.765074000  |
| Au | 1.460174000  | 14.487312000 | 4.789261000  |
| Au | 13.272743000 | 4.257455000  | 4.809768000  |
| Au | 10.315211000 | 9.369451000  | 4.814299000  |
| Au | 7.361245000  | 14.467009000 | 4.778791000  |
| Fe | 3.822038000  | 8.456417000  | 9.936853000  |
| N  | 1.922554000  | 9.029973000  | 10.054959000 |
| N  | 4.010129000  | 9.696972000  | 11.478962000 |
| N  | 4.228293000  | 9.857310000  | 8.709086000  |
| N  | 5.690167000  | 7.832354000  | 9.985240000  |
| N  | 3.580387000  | 7.030415000  | 11.284365000 |
| N  | 3.370946000  | 7.210527000  | 8.545719000  |
| C  | 1.660737000  | 9.748653000  | 11.186904000 |
| C  | 2.800561000  | 10.115278000 | 11.959111000 |
| C  | 0.891023000  | 8.767828000  | 9.240994000  |
| C  | -0.436032000 | 9.102898000  | 9.568612000  |
| C  | -0.714790000 | 9.761202000  | 10.754441000 |
| C  | 0.360038000  | 10.124006000 | 11.599825000 |

|   |              |              |              |
|---|--------------|--------------|--------------|
| C | 0.221870000  | 10.865033000 | 12.818614000 |
| C | 1.315961000  | 11.234795000 | 13.552303000 |
| C | 2.642072000  | 10.895498000 | 13.131171000 |
| C | 3.819804000  | 11.268182000 | 13.817470000 |
| C | 5.042658000  | 10.863489000 | 13.314444000 |
| C | 5.102387000  | 10.078452000 | 12.149205000 |
| C | 4.447172000  | 10.814940000 | 8.051424000  |
| C | 5.923183000  | 6.950394000  | 11.005596000 |
| C | 6.717181000  | 8.132509000  | 9.179019000  |
| C | 4.774259000  | 6.538906000  | 11.731836000 |
| C | 2.460937000  | 6.571599000  | 11.853875000 |
| C | 2.658618000  | 6.511379000  | 7.910885000  |
| C | 7.200268000  | 6.431761000  | 11.326141000 |
| C | 8.012000000  | 7.624184000  | 9.393096000  |
| C | 4.888919000  | 5.623247000  | 12.804021000 |
| C | 2.482497000  | 5.655541000  | 12.919262000 |
| C | 8.270227000  | 6.795380000  | 10.472892000 |
| C | 7.304519000  | 5.557870000  | 12.458132000 |
| C | 6.198910000  | 5.181098000  | 13.174785000 |
| C | 3.691237000  | 5.194249000  | 13.417611000 |
| S | 4.742766000  | 12.174833000 | 7.191362000  |
| S | 1.532789000  | 5.627671000  | 7.118739000  |
| H | 1.105994000  | 8.249134000  | 8.311328000  |
| H | -1.229143000 | 8.833586000  | 8.874487000  |
| H | -1.738239000 | 10.013037000 | 11.033921000 |
| H | -0.779376000 | 11.140073000 | 13.150616000 |
| H | 1.190080000  | 11.808828000 | 14.475202000 |
| H | 3.758992000  | 11.862465000 | 14.729765000 |
| H | 5.970901000  | 11.136571000 | 13.809921000 |
| H | 6.059212000  | 9.742493000  | 11.751215000 |
| H | 6.509891000  | 8.791962000  | 8.340516000  |
| H | 1.521192000  | 6.936847000  | 11.450289000 |

|   |             |             |              |
|---|-------------|-------------|--------------|
| H | 8.802077000 | 7.885014000 | 8.686928000  |
| H | 1.534904000 | 5.323266000 | 13.338493000 |
| H | 9.269718000 | 6.403786000 | 10.653630000 |
| H | 8.286830000 | 5.179942000 | 12.738368000 |
| H | 6.304732000 | 4.510162000 | 14.027826000 |
| H | 3.712216000 | 4.498097000 | 14.256444000 |

**LS1@Au(111)<sub>opt</sub>**

|    |              |              |             |
|----|--------------|--------------|-------------|
| Au | 0.000000000  | 0.000000000  | 0.000000000 |
| Au | -2.949542000 | 5.108757000  | 0.000000000 |
| Au | -5.899085000 | 10.217514000 | 0.000000000 |
| Au | 5.899075000  | 0.000000000  | 0.000000000 |
| Au | 2.949532000  | 5.108757000  | 0.000000000 |
| Au | -0.000012000 | 10.217514000 | 0.000000000 |
| Au | 11.798149000 | 0.000000000  | 0.000000000 |
| Au | 8.848606000  | 5.108757000  | 0.000000000 |
| Au | 5.899062000  | 10.217514000 | 0.000000000 |
| Au | -1.474771000 | 2.554378000  | 0.000000000 |
| Au | -4.424314000 | 7.663137000  | 0.000000000 |
| Au | -7.373856000 | 12.771894000 | 0.000000000 |
| Au | 4.424303000  | 2.554378000  | 0.000000000 |
| Au | 1.474758000  | 7.663137000  | 0.000000000 |
| Au | -1.474785000 | 12.771894000 | 0.000000000 |
| Au | 10.323377000 | 2.554378000  | 0.000000000 |
| Au | 7.373833000  | 7.663137000  | 0.000000000 |
| Au | 4.424291000  | 12.771894000 | 0.000000000 |
| Au | 2.949537000  | 0.000000000  | 0.000000000 |
| Au | -0.000006000 | 5.108757000  | 0.000000000 |
| Au | -2.949549000 | 10.217514000 | 0.000000000 |
| Au | 8.848614000  | 0.000000000  | 0.000000000 |
| Au | 5.899071000  | 5.108757000  | 0.000000000 |
| Au | 2.949529000  | 10.217514000 | 0.000000000 |
| Au | 14.747688000 | 0.000000000  | 0.000000000 |

|    |              |              |             |
|----|--------------|--------------|-------------|
| Au | 11.798146000 | 5.108757000  | 0.000000000 |
| Au | 8.848602000  | 10.217514000 | 0.000000000 |
| Au | 1.474766000  | 2.554378000  | 0.000000000 |
| Au | -1.474779000 | 7.663137000  | 0.000000000 |
| Au | -4.424321000 | 12.771894000 | 0.000000000 |
| Au | 7.373843000  | 2.554378000  | 0.000000000 |
| Au | 4.424298000  | 7.663137000  | 0.000000000 |
| Au | 1.474756000  | 12.771894000 | 0.000000000 |
| Au | 13.272917000 | 2.554378000  | 0.000000000 |
| Au | 10.323372000 | 7.663137000  | 0.000000000 |
| Au | 7.373830000  | 12.771894000 | 0.000000000 |
| Au | 1.474789000  | 0.851469000  | 2.408288000 |
| Au | -1.474755000 | 5.960227000  | 2.408288000 |
| Au | -4.424299000 | 11.068983000 | 2.408288000 |
| Au | 7.373864000  | 0.851469000  | 2.408288000 |
| Au | 4.424322000  | 5.960227000  | 2.408288000 |
| Au | 1.474778000  | 11.068983000 | 2.408288000 |
| Au | 13.272939000 | 0.851469000  | 2.408288000 |
| Au | 10.323396000 | 5.960227000  | 2.408288000 |
| Au | 7.373853000  | 11.068983000 | 2.408288000 |
| Au | 0.000017000  | 3.405848000  | 2.408288000 |
| Au | -2.949526000 | 8.514602000  | 2.408288000 |
| Au | -5.899071000 | 13.623364000 | 2.408288000 |
| Au | 5.899093000  | 3.405848000  | 2.408288000 |
| Au | 2.949550000  | 8.514602000  | 2.408288000 |
| Au | 0.000005000  | 13.623364000 | 2.408288000 |
| Au | 11.798166000 | 3.405848000  | 2.408288000 |
| Au | 8.848626000  | 8.514602000  | 2.408288000 |
| Au | 5.899080000  | 13.623364000 | 2.408288000 |
| Au | 4.424325000  | 0.851469000  | 2.408288000 |
| Au | 1.474782000  | 5.960227000  | 2.408288000 |
| Au | -1.474761000 | 11.068983000 | 2.408288000 |



|    |              |              |             |
|----|--------------|--------------|-------------|
| Au | 10.323399000 | 0.851469000  | 2.408288000 |
| Au | 7.373856000  | 5.960227000  | 2.408288000 |
| Au | 4.424313000  | 11.068983000 | 2.408288000 |
| Au | 16.222478000 | 0.851469000  | 2.408288000 |
| Au | 13.272936000 | 5.960227000  | 2.408288000 |
| Au | 10.323393000 | 11.068983000 | 2.408288000 |
| Au | 2.949553000  | 3.405848000  | 2.408288000 |
| Au | 0.000011000  | 8.514602000  | 2.408288000 |
| Au | -2.949535000 | 13.623364000 | 2.408288000 |
| Au | 8.848626000  | 3.405848000  | 2.408288000 |
| Au | 5.899086000  | 8.514602000  | 2.408288000 |
| Au | 2.949540000  | 13.623364000 | 2.408288000 |
| Au | 14.747706000 | 3.405848000  | 2.408288000 |
| Au | 11.798165000 | 8.514602000  | 2.408288000 |
| Au | 8.848619000  | 13.623364000 | 2.408288000 |
| Au | 0.007674000  | 1.707931000  | 4.800431000 |
| Au | -2.961471000 | 6.817804000  | 4.809912000 |
| Au | -5.910522000 | 11.902291000 | 4.808145000 |
| Au | 5.928450000  | 1.600394000  | 4.774894000 |
| Au | 2.863809000  | 6.818111000  | 4.755379000 |
| Au | -0.060658000 | 11.906690000 | 4.819039000 |
| Au | 11.784743000 | 1.733414000  | 4.822715000 |
| Au | 8.883917000  | 6.820946000  | 4.811686000 |
| Au | 6.000710000  | 11.908071000 | 4.780649000 |
| Au | -1.511641000 | 4.259935000  | 4.821306000 |
| Au | -4.427013000 | 9.364467000  | 4.793317000 |
| Au | -7.393690000 | 14.441136000 | 4.818131000 |
| Au | 4.465450000  | 4.197845000  | 4.769223000 |
| Au | 1.432047000  | 9.346320000  | 4.813743000 |
| Au | -1.466139000 | 14.429256000 | 4.821481000 |
| Au | 10.357593000 | 4.257548000  | 4.821509000 |
| Au | 7.394974000  | 9.357081000  | 4.807907000 |

|    |              |              |              |
|----|--------------|--------------|--------------|
| Au | 4.443737000  | 14.607836000 | 4.731547000  |
| Au | 2.927368000  | 1.613096000  | 4.756106000  |
| Au | -0.046145000 | 6.807285000  | 4.802162000  |
| Au | -2.961444000 | 11.904382000 | 4.813145000  |
| Au | 8.838426000  | 1.712064000  | 4.806467000  |
| Au | 5.985282000  | 6.789939000  | 4.785997000  |
| Au | 2.805129000  | 11.911495000 | 4.760767000  |
| Au | 14.768915000 | 1.746352000  | 4.823084000  |
| Au | 11.800549000 | 6.814691000  | 4.795776000  |
| Au | 8.878958000  | 11.914577000 | 4.814611000  |
| Au | 1.394971000  | 4.276872000  | 4.768284000  |
| Au | -1.489991000 | 9.362176000  | 4.807147000  |
| Au | -4.429091000 | 14.421392000 | 4.805884000  |
| Au | 7.455343000  | 4.266404000  | 4.787236000  |
| Au | 4.443286000  | 9.202824000  | 4.701004000  |
| Au | 1.448776000  | 14.528448000 | 4.781139000  |
| Au | 13.271724000 | 4.252629000  | 4.819360000  |
| Au | 10.317936000 | 9.363265000  | 4.817605000  |
| Au | 7.385099000  | 14.509964000 | 4.794779000  |
| Fe | 3.793534000  | 8.093076000  | 9.181919000  |
| N  | 1.882925000  | 8.557665000  | 9.160290000  |
| N  | 3.880456000  | 9.472773000  | 10.567673000 |
| N  | 4.061755000  | 9.508790000  | 7.932863000  |
| N  | 5.701830000  | 7.614136000  | 9.160563000  |
| N  | 3.705210000  | 6.729590000  | 10.592758000 |
| N  | 3.564002000  | 6.622818000  | 7.942995000  |
| C  | 1.596069000  | 9.609265000  | 9.980730000  |
| C  | 2.678279000  | 10.088057000 | 10.769382000 |
| C  | 0.916043000  | 8.102940000  | 8.355744000  |
| C  | -0.371947000 | 8.669099000  | 8.344108000  |
| C  | -0.676334000 | 9.724281000  | 9.186824000  |
| C  | 0.325524000  | 10.224639000 | 10.049876000 |

|   |              |              |              |
|---|--------------|--------------|--------------|
| C | 0.156002000  | 11.311366000 | 10.970574000 |
| C | 1.189052000  | 11.752865000 | 11.754631000 |
| C | 2.492617000  | 11.160559000 | 11.673738000 |
| C | 3.622832000  | 11.579830000 | 12.409664000 |
| C | 4.835711000  | 10.940070000 | 12.207026000 |
| C | 4.933155000  | 9.893847000  | 11.275121000 |
| C | 4.154941000  | 10.597286000 | 7.483818000  |
| C | 5.982460000  | 6.562166000  | 9.983122000  |
| C | 6.663886000  | 8.038295000  | 8.334058000  |
| C | 4.903415000  | 6.104080000  | 10.787593000 |
| C | 2.657985000  | 6.327633000  | 11.319868000 |
| C | 3.844590000  | 5.508592000  | 7.648833000  |
| C | 7.240331000  | 5.919924000  | 10.032187000 |
| C | 7.939638000  | 7.449083000  | 8.305981000  |
| C | 5.085684000  | 5.035215000  | 11.696420000 |
| C | 2.755819000  | 5.297530000  | 12.269342000 |
| C | 8.237553000  | 6.393692000  | 9.149953000  |
| C | 7.404796000  | 4.832957000  | 10.953361000 |
| C | 6.377631000  | 4.416096000  | 11.758163000 |
| C | 3.964108000  | 4.645576000  | 12.459886000 |
| S | 4.296390000  | 12.111431000 | 6.857576000  |
| S | 4.237775000  | 3.977395000  | 7.266839000  |
| H | 1.181187000  | 7.278949000  | 7.693419000  |
| H | -1.108130000 | 8.271210000  | 7.644961000  |
| H | -1.667677000 | 10.179691000 | 9.171994000  |
| H | -0.821593000 | 11.792435000 | 11.030024000 |
| H | 1.036929000  | 12.582359000 | 12.446831000 |
| H | 3.537146000  | 12.404167000 | 13.119190000 |
| H | 5.729047000  | 11.245372000 | 12.750279000 |
| H | 5.881882000  | 9.395730000  | 11.079772000 |
| H | 6.407592000  | 8.853022000  | 7.657573000  |
| H | 1.710586000  | 6.830027000  | 11.128475000 |

|   |             |             |              |
|---|-------------|-------------|--------------|
| H | 8.670208000 | 7.827557000 | 7.590456000  |
| H | 1.868108000 | 5.013477000 | 12.833066000 |
| H | 9.219384000 | 5.919230000 | 9.122387000  |
| H | 8.373749000 | 4.333117000 | 10.997395000 |
| H | 6.524392000 | 3.587313000 | 12.452590000 |
| H | 4.051121000 | 3.829466000 | 13.178964000 |
